# Supplementary material for: Luminescence of five-coordinated nickel(ii) complexes with substituted-8-hydroxyquinolines and macrocyclic ligands
Source: Royal Society of Chemistry journal article supplement (doi:10.1039/b917994a), 2009-12-17
Supplement: b917994a.pdf [file b917994a.pdf]

## Supplementary Information

### Luminescence of Five-coordinated Nickel(II) Complexes with Substituted- 8-Hydroxyquinolines and Macrocyclic Ligands

*M. Dolores Santana,<sup>a\*</sup> Rocío García-Bueno,<sup>a</sup> and Gabriel García,<sup>a</sup> José Pérez,<sup>b</sup> Luis  
García,<sup>b</sup> Miguel Monge,<sup>c</sup> and Antonio Laguna<sup>d</sup>*

<sup>a</sup> Departamento de Química Inorgánica, Universidad de Murcia, 30071 Murcia, Spain.

<sup>b</sup> Departamento de Ingeniería Minera, Geológica y Cartográfica. Área de Química Inorgánica, Universidad Politécnica de Cartagena, E-30203 Cartagena, Spain.

<sup>c</sup> Departamento de Química, Complejo Científico-Técnico, Universidad de La Rioja, 26004 Logroño, Spain.

<sup>d</sup> Departamento de Química Inorgánica, ICMA, Universidad de Zaragoza-CSIC, 50009-Zaragoza, Spain.

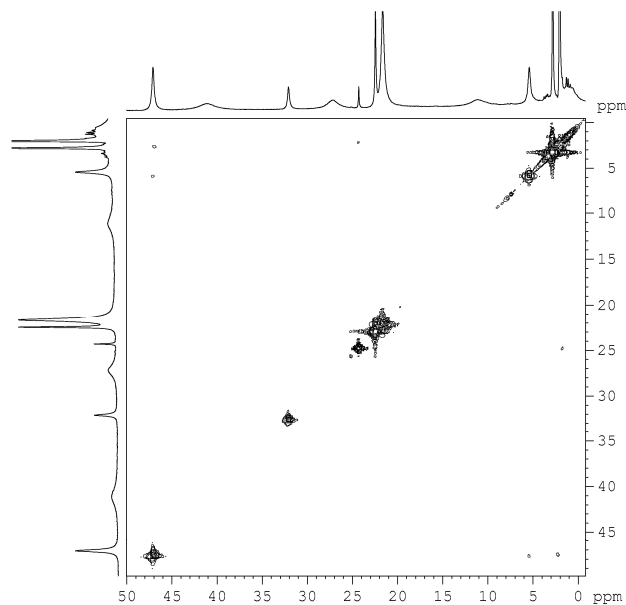

**Figure 1S.** Magnitude  $\{^1\text{H}-^1\text{H}\}$  COSY spectrum of complex **4b** at 200MHz at 21 °C in  $(\text{CD}_3)_2\text{CO}$  solution. Only the region relevant to the assignment of quinolinolate resonances is shown in the top trace.

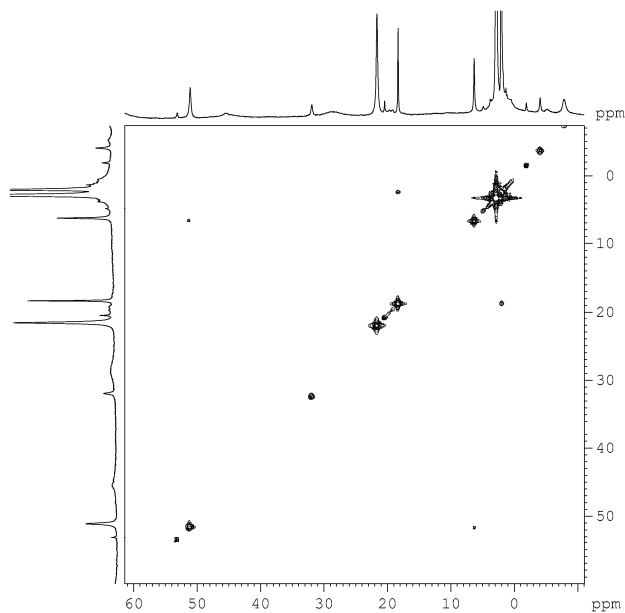

**Figure 2S.** Magnitude  $\{^1\text{H}-^1\text{H}\}$  COSY spectrum of complex **7a** at 200MHz at 21 °C in  $(\text{CD}_3)_2\text{CO}$  solution. Only the region relevant to the assignment of quinolinolate resonances is shown in the top trace.
